# Supplementary material for: Low-temperature MoO3film from a facile synthetic route for an efficient anode interfacial layer in organic optoelectronic devices
Source: Royal Society of Chemistry journal article supplement (doi:10.1039/c3tc31580k), 2013-10-16
Supplement: c3tc31580k.pdf [file c3tc31580k.pdf]

## Electronic Supplementary Information

### Low-Temperature MoO<sub>3</sub> Film from a Facile Synthetic Route for an Efficient Anode Interfacial Layer in Organic Optoelectronic Devices

Jun Liu, Xinkai Wu, Sujie Chen, Xingdong Shi, Jing Wang, Saijun Huang, Xiaojun Guo and Gufeng He\*  
National Engineering Lab for TFT-LCD Materials and Technologies, and Department of Electronic Engineering, Shanghai Jiao Tong University, Shanghai 200240, People's Republic of China. Fax: +86 21 34204371; Tel: +86 21 34207045; E-mail: [gufenghe@sjtu.edu.cn](mailto:gufenghe@sjtu.edu.cn)

#### 1. X-ray Photoemission Spectroscopy (XPS) spectra of sMoO<sub>3</sub> prepared under different conditions

We have used KLA-TENCOR XP-200 Profiler to measure the thicknesses of sMoO<sub>3</sub> films prepared from 2, 10 and 20 mg ml<sup>-1</sup> solutions. The thickness of sMoO<sub>3</sub> film from 20 mg ml<sup>-1</sup> solution is about 10 nm, which is almost identical to the height of nanoplate measured by AFM as shown in Figure 2. However, the thickness of sMoO<sub>3</sub> films from 2 and 10 mg ml<sup>-1</sup> are too thin to be determined precisely, due to the discontinuous nature of film prepared from the diluted solution. To further elucidate the surface morphology of sMoO<sub>3</sub>, we use XPS to measure the surface electronic property of sMoO<sub>3</sub> prepared under different conditions on the ITO substrate. As shown in Figure S1, ITO and sMoO<sub>3</sub> from 2 mg ml<sup>-1</sup> solution have almost overlapping characteristic peaks of In 3p, In 3d and Sn 3d in the full XPS spectra, indicating discontinuous sMoO<sub>3</sub> film on ITO. This is consistent with the discrete nanoplate image of sMoO<sub>3</sub> from 2 mg ml<sup>-1</sup>, as shown in Fig. 2(b). sMoO<sub>3</sub> from 10 mg ml<sup>-1</sup> solution shows remarkably reduced intensity of In 3p, In 3d and Sn 3d, meaning a certain thick sMoO<sub>3</sub> film covering the ITO substrate. Since the detected depth of XPS is about 5 nm, and the characteristic peaks of ITO still exist in sMoO<sub>3</sub> film from 10 mg ml<sup>-1</sup> solution, the thickness of such sMoO<sub>3</sub> film is less than 5 nm. For the sMoO<sub>3</sub> from 20 mg ml<sup>-1</sup> solution, no characteristic peaks of ITO are found in XPS spectrum, referring that the ITO substrate is completely covered by the sMoO<sub>3</sub> film.

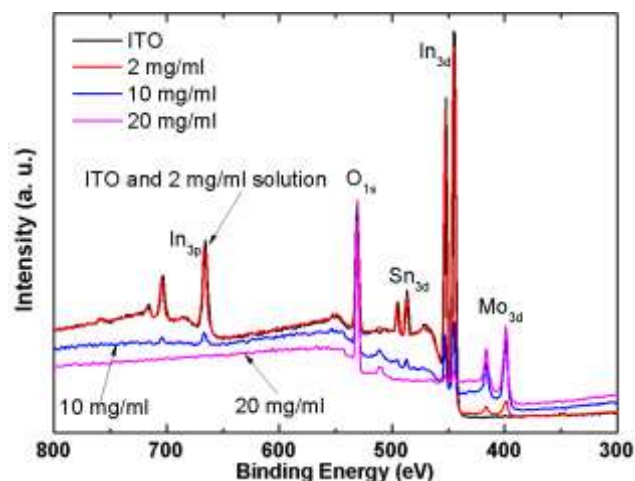

**Fig. S1** XPS spectra of sMoO<sub>3</sub> prepared under different conditions on ITO substrate.

#### 2. Optical transparency of sMoO<sub>3</sub>

Fig. S2 shows the optical transmission of PEDOT:PSS (9000 rpm) with 10 nm thickness and sMoO<sub>3</sub> (about 10 nm thickness) from 20 mg ml<sup>-1</sup> solution. At the wavelength larger than 350 nm, the optical transmission of sMoO<sub>3</sub> is larger than that of PEDOT:PSS. The optical transmission of sMoO<sub>3</sub> is nearly 100% in the visible light region, indicating ultra high transparency of sMoO<sub>3</sub> film with 10 nm.

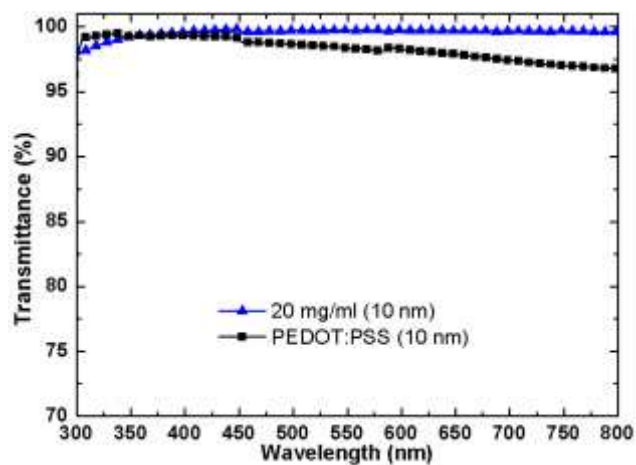

**Fig. S2** Optical transparency of sMoO<sub>3</sub> and PEDOT:PSS with the almost same thickness.

### 3. UPS Spectra of sMoO<sub>3</sub>.

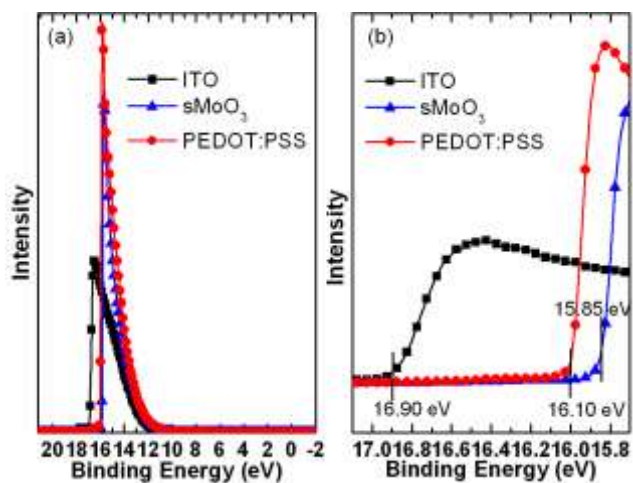

**Fig. S3** UPS spectra of sMoO<sub>3</sub>, PEDOT:PSS and ITO, including (a) the full UPS spectrum using He I radiation, and (b) secondary-electron cutoff.
